# Supplementary material for: Crystal Structure of 4-Hydroxyphenylpyruvate Dioxygenase in Complex with Substrate Reveals a New Starting Point for Herbicide Discovery
Source: PubMed Central journal article supplement (PMC6750108; doi:10.34133/2019/2602414), 2019-07-08
Supplement: 2602414.f1.pdf [file 2602414.f1.pdf]

1 ***Supporting Information***

2

3 **Crystal Structure of 4-Hydroxyphenylpyruvate Dioxygenase in Complex**  
4 **with Its Natural Substrate Reveals A New Starting Point for Herbicide**  
5 **Discovery**

6

7 Hong-Yan Lin,<sup>1,3†</sup> Xi Chen,<sup>2†</sup> Jia-Nan Chen,<sup>1</sup> Da-Wei Wang,<sup>1</sup> Feng-Xu Wu,<sup>1</sup> Song-Yun Lin,<sup>3</sup>  
8 Chang-Guo Zhan,<sup>1</sup> Jia-Wei Wu,<sup>3</sup> Wen-Chao Yang,<sup>1\*</sup> Guang-Fu Yang<sup>1,4\*</sup>

9

10

11

12 *<sup>1</sup>Key Laboratory of Pesticide & Chemical Biology of Ministry of Education, International Joint Research*  
13 *Center for Intelligent Biosensor Technology and Health, College of Chemistry, Chemical Biology Center,*  
14 *Central China Normal University, Wuhan 430079, P.R. China; <sup>2</sup>College of Chemistry and Material Science,*  
15 *South-Central University for Nationalities, Wuhan 430074, P. R. China; <sup>3</sup>MOE Key Laboratory of Protein*  
16 *Sciences, Tsinghua-Peking Center for Life Sciences, School of Life Sciences, Tsinghua University, Beijing*  
17 *100084, P. R. China; <sup>4</sup>Collaborative Innovation Center of Chemical Science and Engineering, Tianjin 30071,*  
18 *P.R. China.*

19

20

21

22

23

24

25 <sup>†</sup> These two authors made equal contributions.

26 \*Wen-Chao Yang, e-mail: [tomyang@mail.ccnu.edu.cn](mailto:tomyang@mail.ccnu.edu.cn); Tel: 86-27-67867706; Fax: 86-27-67867141.

27 \*Guang-Fu Yang, e-mail: [gfyang@mail.ccnu.edu.cn](mailto:gfyang@mail.ccnu.edu.cn); Tel: 86-27-67867800; Fax: 86-27-67867141.

28

29 **Supplemental Figures**

30

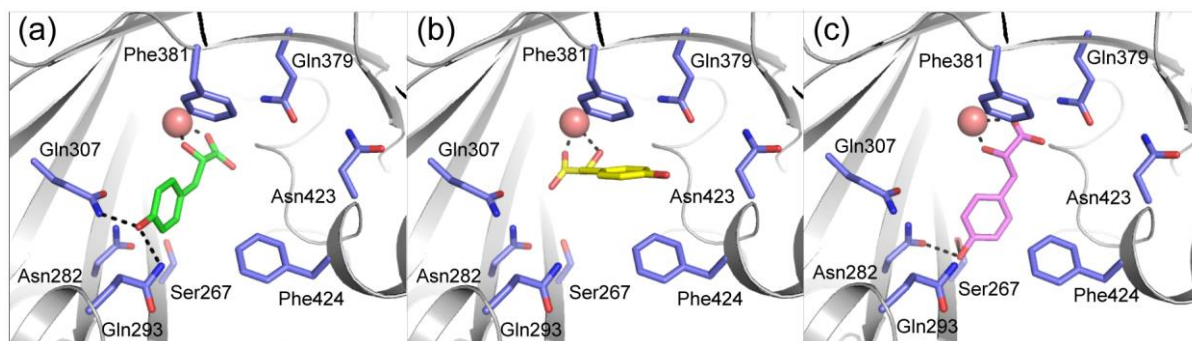

32 **Figure S1** Three proposed binding models of HPPA in HPPD active site. (a) Inspired by the  
33 crystal structure of *pseudomonas fluorescens* HPPD. (b) Hypothesized according to the crystal  
34 structure of *streptomyces avermitilis* HPPD complexed with NTBC. (c) Hypothesized  
35 according to the HMA binding mode in hydroxymandelate synthase. The key residues showed  
36 as purple sticks, and HPPA showed as green, yellow and pink sticks, respectively.

37

38

39

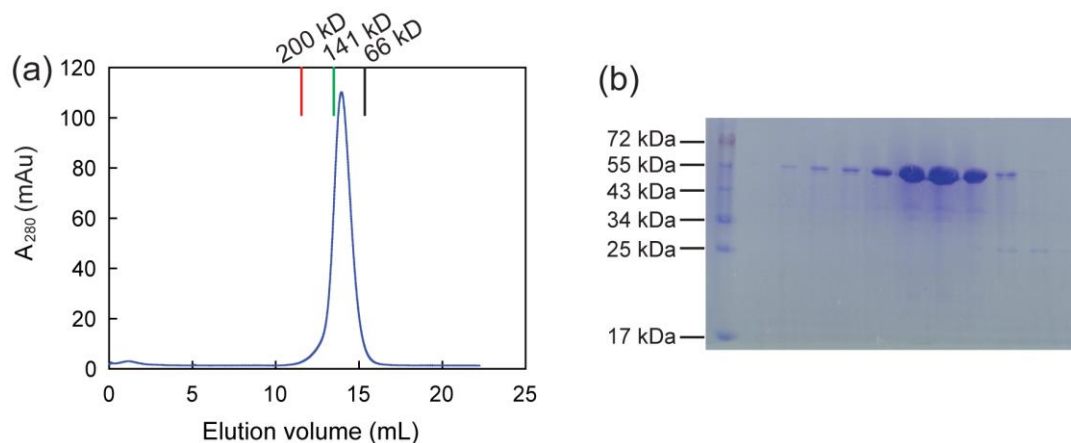

40 **Figure S2** Gel filtration analyses to analyze the oligomerization state of the purified *AtHPPD*  
41 (a) and the SDS-PAGE of *AtHPPD* (b).

43

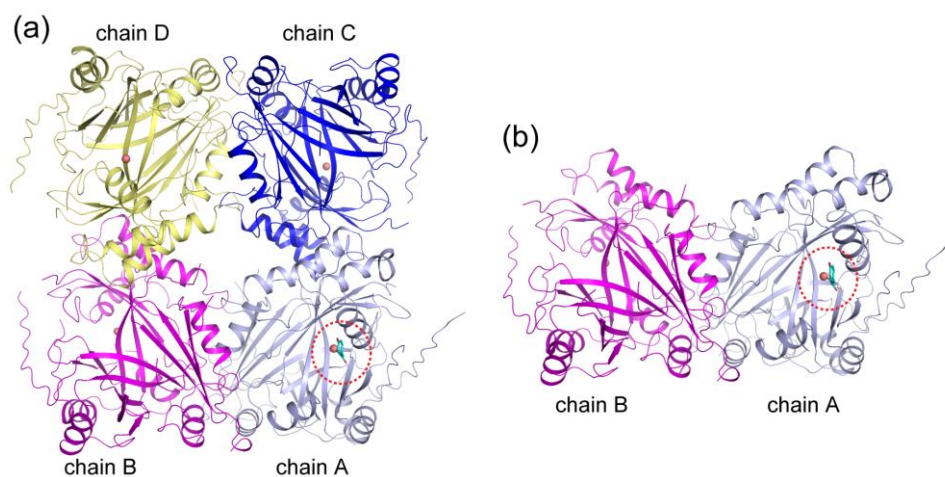

44

45 **Figure S3** Overall structure of *At*HPPD-HPPA complex. (a) Four molecules in one  
 46 asymmetric unit which is made up of two homodimers. The metal ion (M) in the active site is  
 47 shown as deep salmon sphere. HPPA was shown in cyan stick. (b) Ribbon diagram of  
 48 homodimer structure.

49

50

51

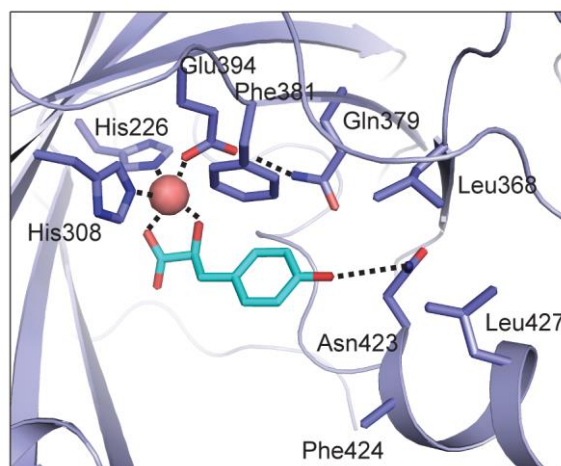

52

53 **Figure S4** Overall binding mode of HPPA in *At*HPPD active site. HPPA forms T- $\pi$  interaction  
 54 with Phe381 and weak hydrophobic interaction with residues Leu368 and Leu427.

55

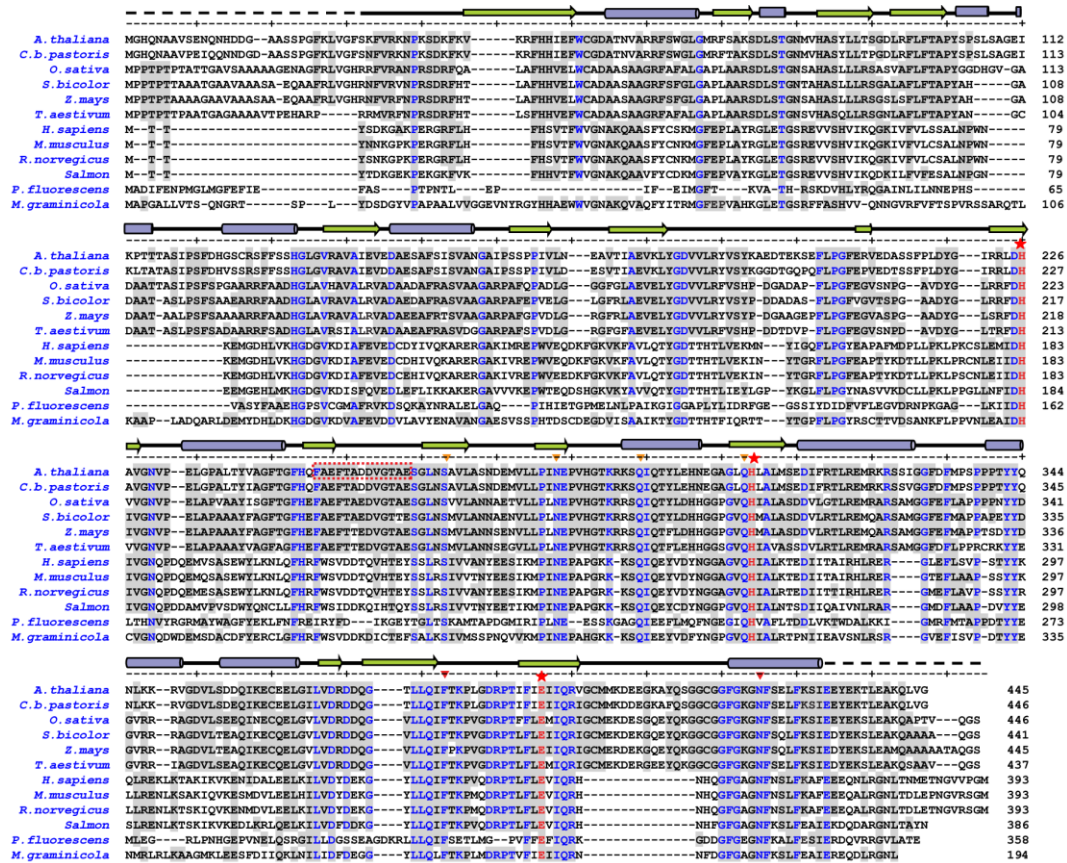

56  
 57 **Figure S5** Sequence alignment of HPPD from different species. The facial triad residues  
 58 involved in the chelation with Fe<sup>2+</sup> are shown in red and indicated by red stars. Residues  
 59 involved in the direct interactions with HPPA indicated by red triangle, while those involved  
 60 in the H bond network indicated by orange triangle. Other conserved residues are shown in  
 61 blue.

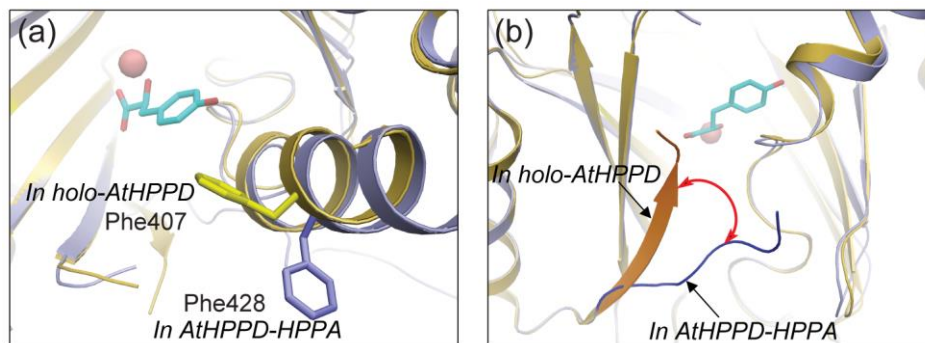

63  
 64 **Figure S6** Structural comparison of *AtHPPD*-HPPA complex (light blue) with holo-*AtHPPD*  
 65 structure (yellow). (a) The conformational alteration of residue Phe407 on the C-terminal  
 66  $\alpha$ -helix. (b) The  $\beta$ -trand fragment (framed with red line in figure S5) rotated about 30° and

67 transformed to be a loop structure.

68

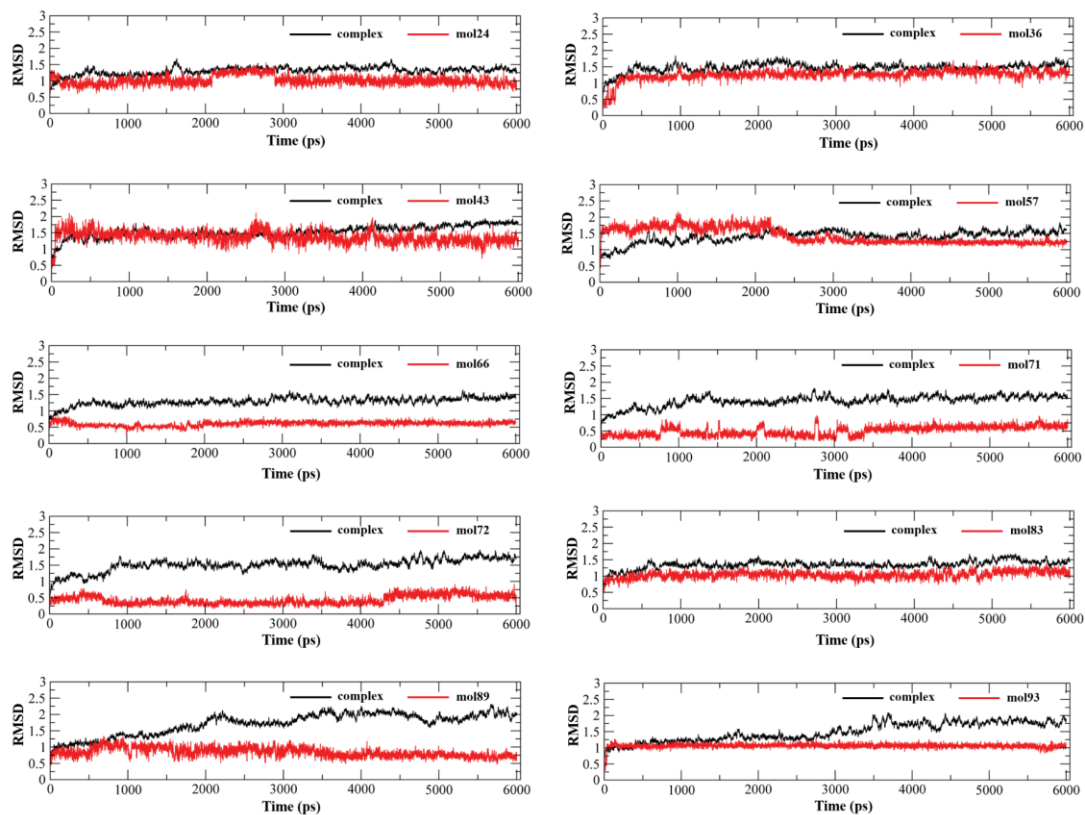

69

70 **Figure S7** Time dependence of the RMSD of protein backbone atoms (color in black) and ten  
71 candidates (color in red) during the MD simulation.

72

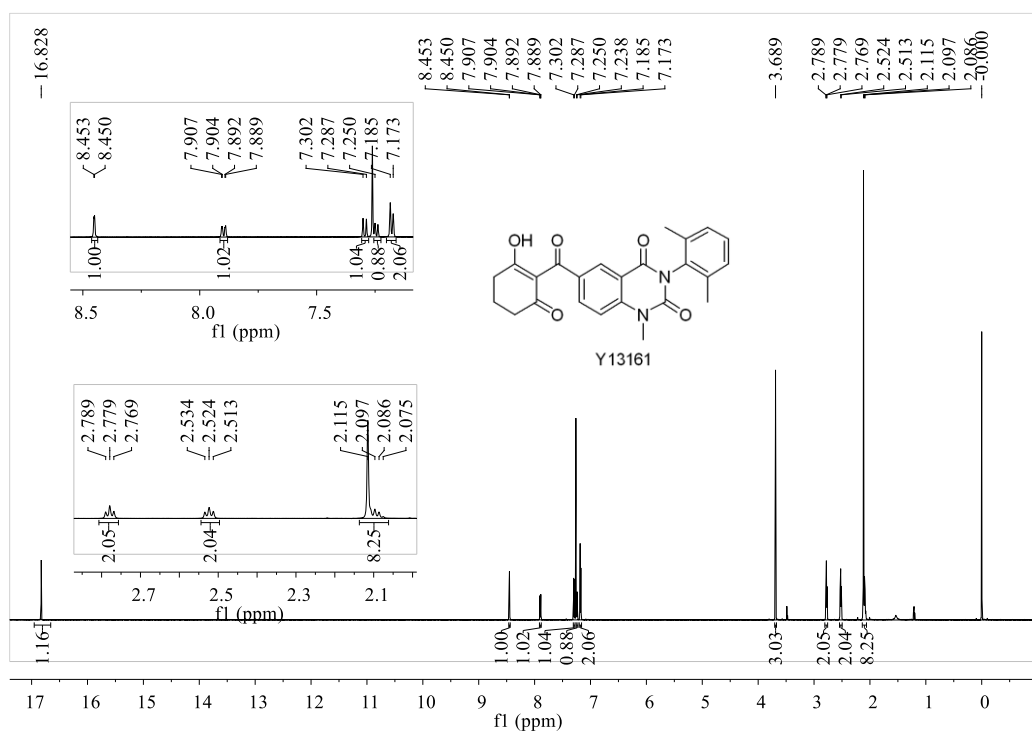

73

74 **Figure S8** <sup>1</sup>H NMR spectral of **Y13161** in CDCl<sub>3</sub>.

75

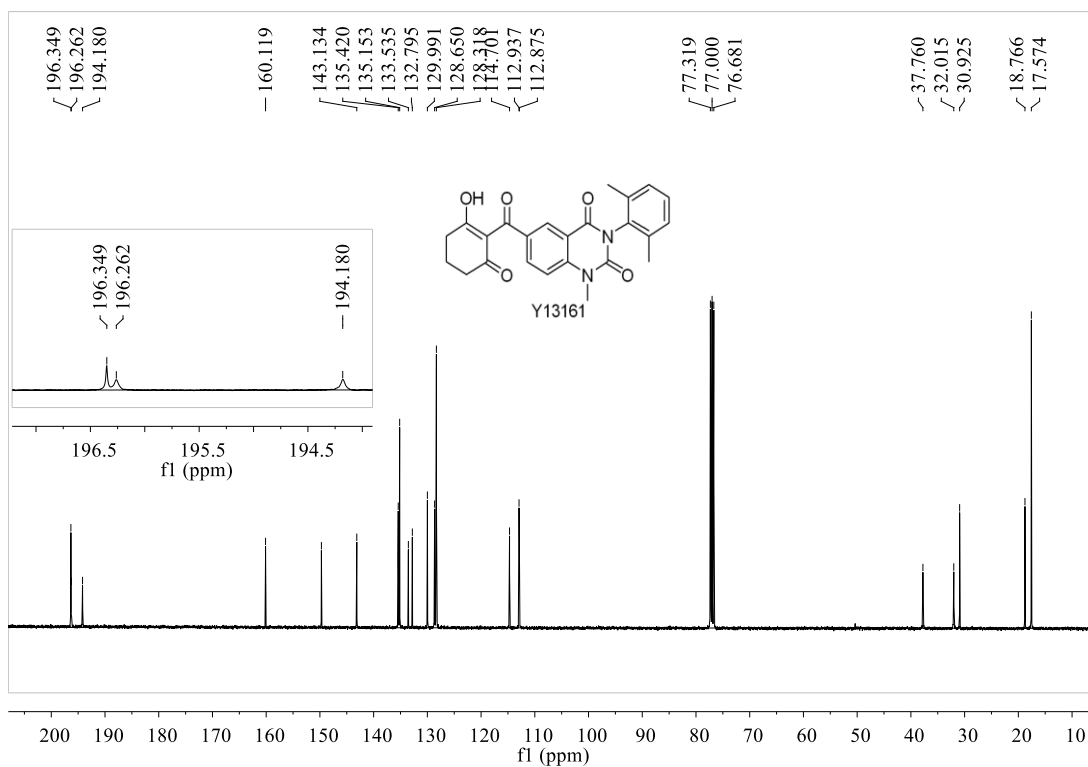

76

77 **Figure S9** <sup>13</sup>C NMR spectral of **Y13161** in CDCl<sub>3</sub>.

78

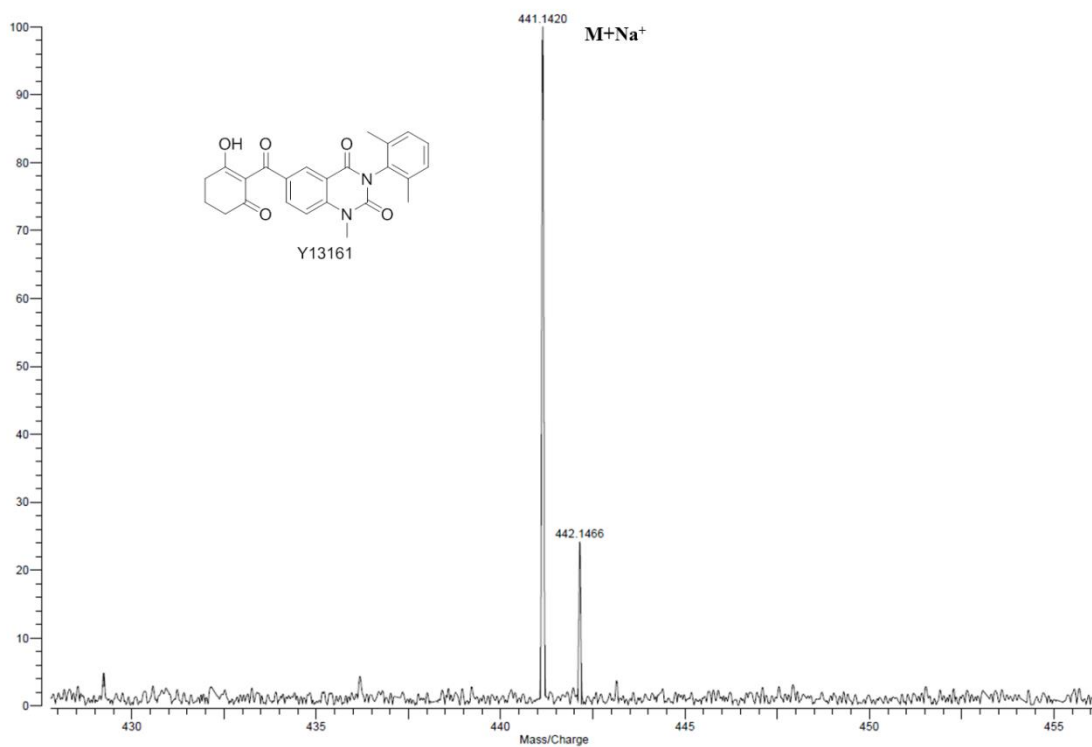

79

80 **Figure S10** HRMS spectrum of **Y13161**.

81

82

83

84

85

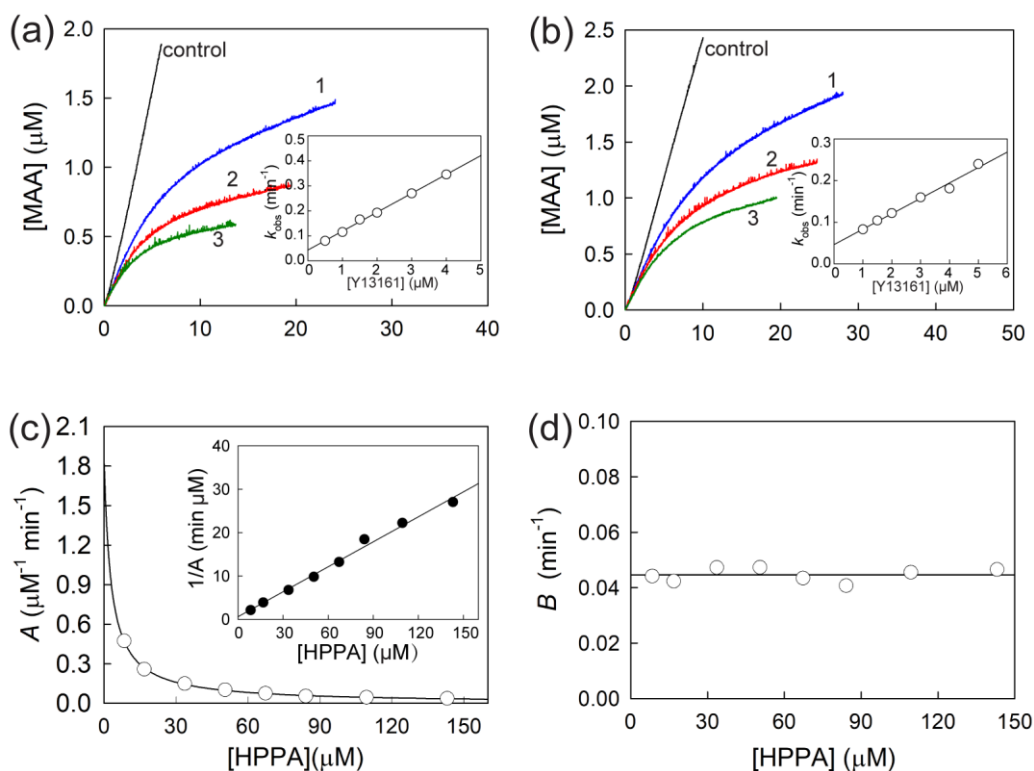

86

87 **Figure S11** Inhibitory kinetics of *AtHPPD* by compound **Y13161**. Each reaction mixture  
 88 contains 20 mM HEPES (pH 7.0), 2 mM Sodium ascorbate, 100  $\mu\text{M}$   $\text{FeSO}_4$ , 14 nM *AtHPPD*,  
 89 a certain amount of HPPA ((a) 80  $\mu\text{M}$ ; (b) 170  $\mu\text{M}$ ), and compound **Y13161** (1, 2.0  $\mu\text{M}$ ; 2, 3.0  
 90  $\mu\text{M}$ ; and 3, 4.0  $\mu\text{M}$ ). Experimental data are shown as colored dots and theoretical values as  
 91 black solid lines. Insets: Plots of  $k_{\text{obs}}$  against concentration of compound **Y13161**. (c) Plot of  
 92 the apparent rate constant  $A$  against concentration of HPPA. Inset: Plot of  $1/A$  against  
 93 concentration of HPPA. (d) Plot of the apparent rate constant  $B$  against concentration of  
 94 HPPA.

95



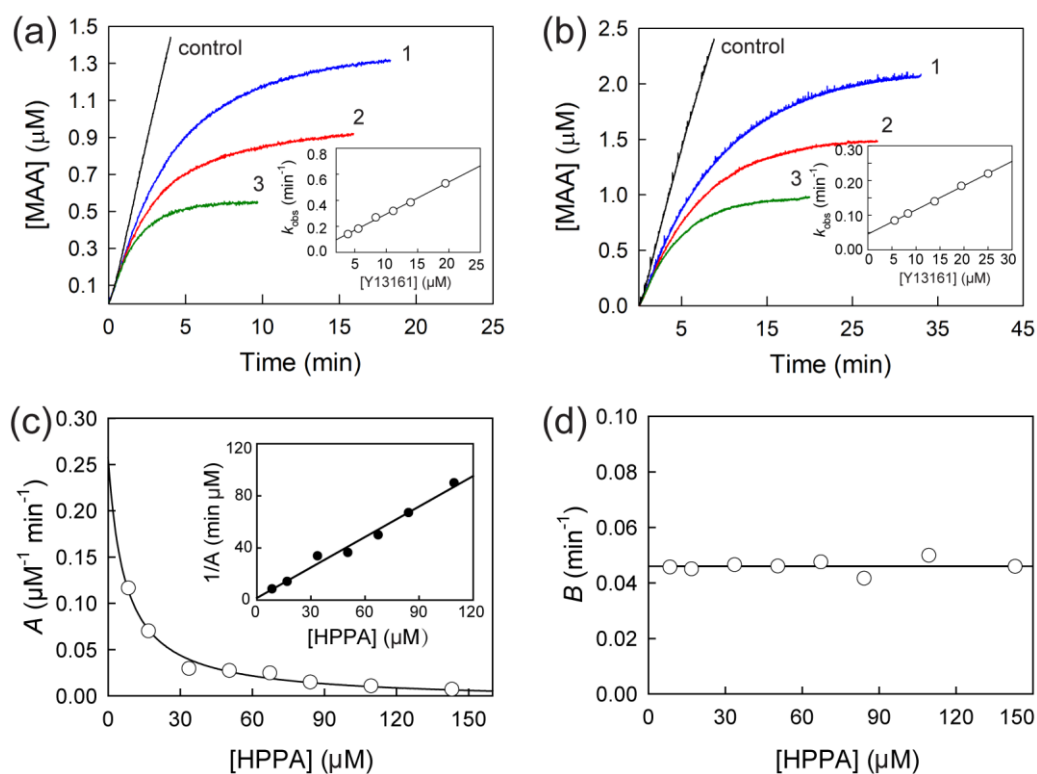

96  
 97 **Figure S12** Inhibitory kinetics of *hHPPD* by compound **Y13161**. Each reaction mixture  
 98 contains 20 mM HEPES (pH 7.0), 2 mM Sodium ascorbate, 100 μM FeSO<sub>4</sub>, 12 nM *hHPPD*, a  
 99 certain amount of HPPA ((a) 80 μM; (b) 170 μM), and compound **Y13161** (1, 8.33 μM; 2,  
 100 13.88 μM; and 3, 19.44 μM). Experimental data are shown as colored dots and theoretical  
 101 values as black solid lines. Insets: Plots of  $k_{obs}$  against concentration of compound **Y13161**.  
 102 (c) Plot of the apparent rate constant  $A$  against concentration of HPPA. Inset: Plot of  $1/A$   
 103 against concentration of HPPA. (d) Plot of the apparent rate constant  $B$  against concentration  
 104 of HPPA.

105

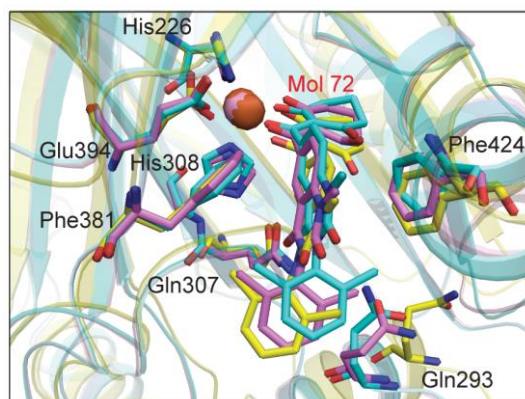

106  
 107 **Figure S13** Comparison of docking binding mode (blue) and MD simulated model (yellow)

108 with co-crystal structure (pink) of *At*HPPD- **Y13161**.

109

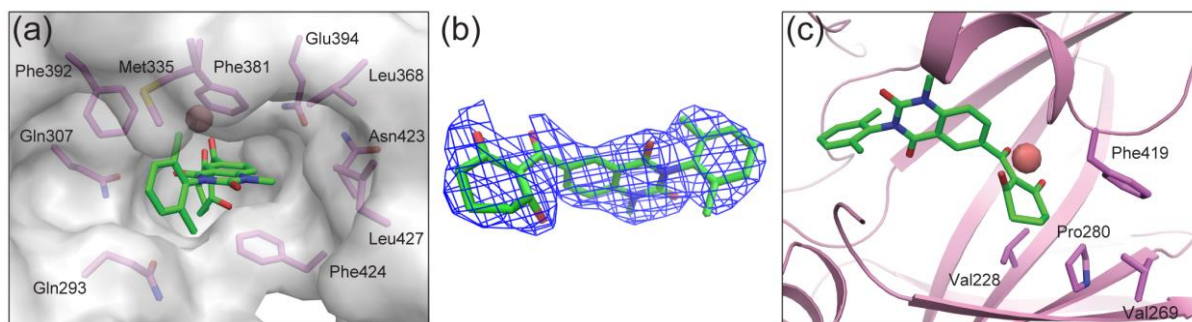

110

111 **Figure S14** The interactions of **Y13161** with *At*HPPD. (a) Active site pocket of *At*HPPD

112 occupied by **Y13161**. (b) The 2Fo-Fc map of **Y13161** contoured at 1.0  $\sigma$ . (c) The hydrophobic

113 interaction of the cyclohexane moiety of **Y13161** with Phe419, Pro280 and Val228.

114

115

116

117

118 **Supplemental Tables**

119 **Table S1** Data collection and refinement statistics for the AtHPPD-HPPA and  
 120 AtHPPD-Y13161 complex.

|                                                                        | AtHPPD-HPPA                    | AtHPPD-Y13161                   |
|------------------------------------------------------------------------|--------------------------------|---------------------------------|
| <i>Crystal parameters</i>                                              |                                |                                 |
| Space group                                                            | P 21                           | C 1 2 1                         |
| <i>a</i> , <i>b</i> , <i>c</i> (Å)                                     | 95.60, 95.29, 98.00            | 77.33, 83.88, 66.31             |
| $\alpha$ , $\beta$ , $\gamma$ (°)                                      | 90.0, 92.1, 90.0               | 90.0, 100.1, 90.0               |
| <i>Diffraction data</i>                                                |                                |                                 |
| Resolution range (Å) <sup>a</sup>                                      | 50-2.8 (2.85-2.8) <sup>a</sup> | 40-2.4 (2.48-2.40) <sup>a</sup> |
| Completeness (%) <sup>a</sup>                                          | 98.2 (99.8) <sup>a</sup>       | 95.7 (88.7) <sup>a</sup>        |
| Unique reflections                                                     | 42692 (4294) <sup>a</sup>      | 15659 (1474) <sup>a</sup>       |
| <i>R</i> <sub>merge</sub>                                              | 0.177 (0.500) <sup>a</sup>     | 0.092 (0.208) <sup>a</sup>      |
| <i>CC1/2</i>                                                           | 0.982 (0.828) <sup>a</sup>     | 0.967 (0.950) <sup>a</sup>      |
| <i>I</i> / $\sigma$ ( <i>I</i> )                                       | 6.34 (2.85) <sup>a</sup>       | 19.7 (5.34) <sup>a</sup>        |
| Subunits per asym. unit                                                | 4                              | 1                               |
| <i>Refinement statistics</i>                                           |                                |                                 |
| <i>R</i> <sub>work</sub>                                               | 0.254 (0.282) <sup>a</sup>     | 0.193 (0.202) <sup>a</sup>      |
| <i>R</i> <sub>free</sub>                                               | 0.316 (0.383) <sup>a</sup>     | 0.245 (0.261) <sup>a</sup>      |
| RMSD Bond length (Å)                                                   | 0.004                          | 0.004                           |
| RMSD Bond angle (°)                                                    | 0.90                           | 0.61                            |
| Clashscore                                                             | 6.55                           | 3.21                            |
| <i>Components of the asymmetry unit (Number of non-hydrogen atoms)</i> |                                |                                 |
|                                                                        | two dimers                     | one monomer                     |
| Protein                                                                | 11102                          | 2828                            |
| Substrate or inhibitor                                                 | 33                             | 32                              |
| Waters                                                                 | 212                            | 35                              |
| <i>Ramachandran plot (%)</i>                                           |                                |                                 |
| Favoured                                                               | 94                             | 97                              |
| Outlier                                                                | 0                              | 0                               |

121 <sup>a</sup>Numbers in parentheses refer to the highest resolution shell.

122 **Table S2** Top 100 compounds from virtual screening with their rank.

| Comp. NO. | Comp. Structure                                                                     | Comp. NO. | Comp. Structure                                                                     | Comp. NO. | Comp. Structure                                                                       |
|-----------|-------------------------------------------------------------------------------------|-----------|-------------------------------------------------------------------------------------|-----------|---------------------------------------------------------------------------------------|
| 1         | 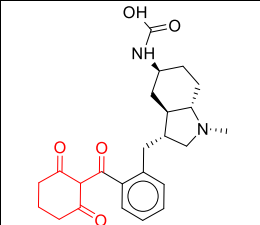   | 2         |    | 3         |    |
| 4         |    | 5         |    | 6         |    |
| 7         |   | 8         |   | 9         |   |
| 10        |  | 11        |  | 12        |  |
| 13        |  | 14        |  | 15        |  |
| 16        |  | 17        |  | 18        |  |
| 19        |  | 20        |  | 21        |  |
| 22        |  | 23        |  | 24        |  |
| 25        |  | 26        |  | 27        |  |

|    |                                                                                     |    |                                                                                     |    |                                                                                       |
|----|-------------------------------------------------------------------------------------|----|-------------------------------------------------------------------------------------|----|---------------------------------------------------------------------------------------|
| 28 | 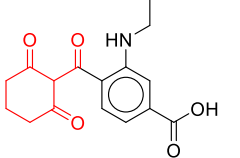   | 29 |    | 30 |    |
| 31 |    | 32 |    | 33 |    |
| 34 |    | 35 |    | 36 |    |
| 37 |    | 38 |    | 39 |    |
| 40 |   | 41 |   | 42 |    |
| 43 |  | 44 |  | 45 |  |
| 46 |  | 47 |  | 48 |  |
| 49 |  | 50 |  | 51 |  |
| 52 |  | 53 |  | 54 |  |
| 55 |  | 56 |  | 57 |  |

|    |  |    |  |    |  |
|----|--|----|--|----|--|
| 58 |  | 59 |  | 60 |  |
| 61 |  | 62 |  | 63 |  |
| 64 |  | 65 |  | 66 |  |
| 67 |  | 68 |  | 69 |  |
| 70 |  | 71 |  | 72 |  |
| 73 |  | 74 |  | 75 |  |
| 76 |  | 77 |  | 78 |  |
| 79 |  | 80 |  | 81 |  |
| 82 |  | 83 |  | 84 |  |
| 85 |  | 86 |  | 87 |  |
| 88 |  | 89 |  | 90 |  |

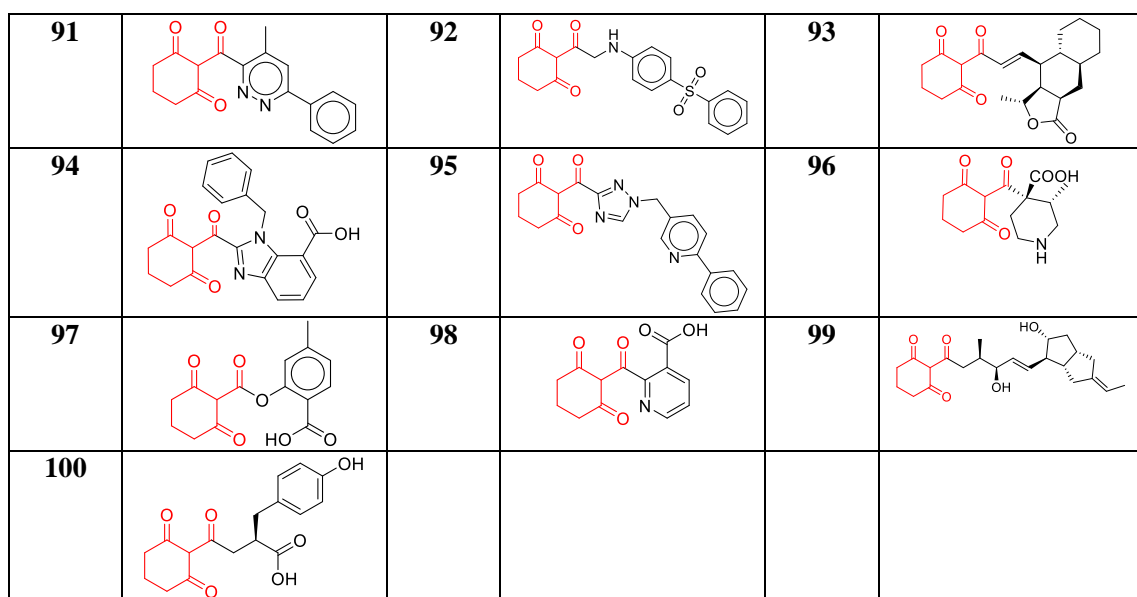

123

124

125 **Table S3** Binding free energy evaluation (kcal/mol) for the top 100 compounds after the  
 126 structure optimization.

| Molecule | H-bond <sup>a</sup> | Electrostatic <sup>b</sup> | vdW <sup>c</sup> | Conformation entropy <sup>d</sup> | Desolvation <sup>e</sup> | Binding free energy |
|----------|---------------------|----------------------------|------------------|-----------------------------------|--------------------------|---------------------|
| 83       | -0.01               | -1.85                      | -13.06           | 1.19                              | 2.49                     | -11.24              |
| 36       | -0.02               | -1.74                      | -11.23           | 0.89                              | 1.43                     | -10.67              |
| 89       | 0.00                | -1.67                      | -11.04           | 0.89                              | 1.39                     | -10.43              |
| 24       | -0.07               | -1.51                      | -12.35           | 1.49                              | 2.14                     | -10.30              |
| 66       | -0.03               | -1.54                      | -12.59           | 1.49                              | 2.40                     | -10.28              |
| 43       | -0.16               | -1.57                      | -12.34           | 1.49                              | 2.34                     | -10.24              |
| 93       | -0.04               | -1.56                      | -10.74           | 0.89                              | 1.46                     | -9.98               |
| 57       | -0.01               | -1.51                      | -12.23           | 1.79                              | 2.17                     | -9.79               |
| 71       | 0.00                | -1.09                      | -11.81           | 0.89                              | 2.30                     | -9.71               |
| 72       | -0.08               | -1.57                      | -11.16           | 0.89                              | 2.23                     | -9.69               |
| 58       | -0.21               | -1.37                      | -10.24           | 0.30                              | 1.88                     | -9.64               |
| 78       | -0.03               | -1.58                      | -10.83           | 0.60                              | 2.20                     | -9.64               |
| 81       | 0.00                | -1.43                      | -11.02           | 0.89                              | 1.96                     | -9.60               |

---

|    |       |       |        |      |      |       |
|----|-------|-------|--------|------|------|-------|
| 79 | -0.46 | -1.34 | -11.32 | 0.80 | 2.74 | -9.58 |
| 85 | -0.03 | -1.71 | -11.23 | 1.19 | 2.33 | -9.45 |
| 91 | -0.02 | -1.62 | -10.41 | 0.89 | 1.79 | -9.36 |
| 69 | -0.12 | -1.45 | -11.56 | 1.49 | 2.28 | -9.36 |
| 38 | -0.27 | -2.12 | -11.07 | 1.49 | 2.82 | -9.14 |
| 88 | -0.58 | -1.54 | -10.35 | 0.89 | 2.44 | -9.13 |
| 44 | -0.06 | -1.22 | -11.18 | 0.89 | 2.49 | -9.08 |
| 55 | 0.00  | -1.88 | -10.84 | 1.19 | 2.45 | -9.08 |
| 18 | 0.00  | -1.17 | -10.60 | 1.49 | 1.21 | -9.07 |
| 95 | -0.05 | -1.48 | -11.35 | 1.49 | 2.34 | -9.06 |
| 47 | 0.00  | -1.44 | -11.38 | 1.19 | 2.64 | -8.98 |
| 49 | -0.01 | -1.46 | -11.00 | 1.19 | 2.38 | -8.89 |
| 19 | -0.04 | -3.68 | -9.42  | 1.49 | 2.82 | -8.83 |
| 1  | -0.01 | -1.42 | -11.79 | 1.79 | 2.60 | -8.82 |
| 54 | 0.00  | -1.49 | -10.31 | 1.19 | 1.88 | -8.73 |
| 92 | -0.69 | -1.79 | -10.25 | 1.79 | 2.30 | -8.64 |
| 76 | -0.91 | -1.44 | -10.54 | 1.49 | 2.83 | -8.56 |
| 9  | -0.01 | -1.99 | -10.81 | 1.49 | 2.77 | -8.54 |
| 87 | -0.01 | -1.44 | -10.59 | 0.89 | 2.62 | -8.52 |
| 35 | -0.31 | -1.65 | -10.82 | 1.79 | 2.53 | -8.45 |
| 90 | -0.04 | -0.76 | -9.49  | 0.30 | 1.58 | -8.42 |
| 94 | -0.05 | -2.09 | -11.01 | 1.79 | 3.01 | -8.34 |
| 42 | -0.01 | -1.82 | -11.35 | 1.49 | 3.36 | -8.34 |
| 73 | -0.02 | -1.40 | -9.94  | 0.89 | 2.18 | -8.29 |
| 77 | -0.41 | -1.35 | -9.34  | 1.19 | 1.68 | -8.23 |
| 4  | -0.46 | -2.50 | -9.89  | 1.79 | 2.94 | -8.12 |
| 33 | -0.33 | -2.68 | -9.11  | 1.49 | 2.51 | -8.12 |
| 67 | -0.59 | -1.31 | -9.25  | 1.19 | 1.97 | -7.99 |

---



---

|     |       |       |        |      |      |       |
|-----|-------|-------|--------|------|------|-------|
| 68  | -0.27 | -0.98 | -9.47  | 0.89 | 1.84 | -7.98 |
| 75  | -0.57 | -2.24 | -9.04  | 1.19 | 2.80 | -7.86 |
| 26  | -0.05 | -1.74 | -10.92 | 1.79 | 3.20 | -7.72 |
| 39  | -0.38 | -2.10 | -10.48 | 1.79 | 3.51 | -7.66 |
| 34  | -0.77 | -0.46 | -9.60  | 0.89 | 2.28 | -7.65 |
| 16  | -0.91 | -2.87 | -8.11  | 1.49 | 2.75 | -7.64 |
| 80  | 0.00  | -1.54 | -9.11  | 0.89 | 2.14 | -7.63 |
| 64  | -0.10 | -2.30 | -9.11  | 1.19 | 2.74 | -7.59 |
| 37  | -0.04 | -2.77 | -8.03  | 0.89 | 2.35 | -7.59 |
| 52  | -0.02 | -1.83 | -10.50 | 1.79 | 3.05 | -7.50 |
| 22  | -0.01 | -1.27 | -9.78  | 1.49 | 2.08 | -7.49 |
| 7   | -0.69 | -2.19 | -9.65  | 1.79 | 3.30 | -7.44 |
| 12  | -0.86 | -2.76 | -8.81  | 1.49 | 3.50 | -7.44 |
| 13  | -0.06 | -1.76 | -9.50  | 1.49 | 2.47 | -7.36 |
| 84  | 0.00  | -1.59 | -8.89  | 1.19 | 1.95 | -7.33 |
| 10  | 0.00  | -1.80 | -9.44  | 1.79 | 2.18 | -7.27 |
| 5   | 0.00  | -1.79 | -9.06  | 1.49 | 2.15 | -7.21 |
| 50  | -0.01 | -2.25 | -8.83  | 1.79 | 2.15 | -7.16 |
| 62  | -0.02 | -1.58 | -8.65  | 1.19 | 1.96 | -7.10 |
| 59  | 0.00  | -2.51 | -8.47  | 1.19 | 2.70 | -7.09 |
| 27  | -0.90 | -2.29 | -8.92  | 1.79 | 3.24 | -7.08 |
| 21  | -0.53 | -2.22 | -8.92  | 1.79 | 2.81 | -7.08 |
| 74  | 0.00  | -1.61 | -7.38  | 0.89 | 1.03 | -7.07 |
| 100 | -0.03 | -2.04 | -9.83  | 1.79 | 3.08 | -7.03 |
| 82  | -0.01 | -1.35 | -8.52  | 1.49 | 1.37 | -7.01 |
| 23  | -1.08 | -5.54 | -5.37  | 1.79 | 3.19 | -7.01 |
| 6   | 0.00  | -1.81 | -9.20  | 1.49 | 2.52 | -6.99 |
| 97  | -0.24 | -1.94 | -9.07  | 1.49 | 2.79 | -6.97 |

---

---

|    |       |       |        |      |      |       |
|----|-------|-------|--------|------|------|-------|
| 40 | -0.01 | -1.71 | -9.14  | 1.19 | 2.73 | -6.93 |
| 56 | -0.58 | -2.02 | -8.52  | 1.49 | 2.72 | -6.92 |
| 17 | -0.15 | -1.79 | -9.23  | 1.19 | 3.07 | -6.91 |
| 15 | -1.12 | -2.12 | -8.21  | 1.49 | 3.08 | -6.88 |
| 20 | -0.01 | -2.45 | -9.47  | 2.09 | 3.01 | -6.84 |
| 28 | -0.01 | -1.96 | -9.66  | 1.79 | 3.02 | -6.82 |
| 46 | -0.02 | -2.14 | -8.34  | 1.19 | 2.54 | -6.76 |
| 98 | -0.18 | -2.04 | -8.68  | 1.19 | 2.99 | -6.71 |
| 32 | -0.02 | -2.48 | -8.90  | 1.79 | 2.90 | -6.71 |
| 45 | -0.01 | 0.59  | -10.96 | 0.89 | 2.80 | -6.69 |
| 11 | -0.01 | -1.76 | -9.10  | 1.49 | 2.70 | -6.68 |
| 29 | -0.71 | -2.63 | -7.63  | 1.19 | 3.16 | -6.61 |
| 48 | -0.32 | -1.86 | -9.24  | 1.79 | 3.05 | -6.57 |
| 30 | -0.34 | -2.30 | -8.21  | 1.79 | 2.56 | -6.51 |
| 63 | -0.45 | -1.86 | -8.87  | 1.79 | 2.89 | -6.51 |
| 70 | 0.00  | -1.97 | -7.99  | 1.19 | 2.30 | -6.47 |
| 51 | -1.02 | -2.08 | -7.98  | 1.79 | 2.87 | -6.41 |
| 53 | -0.31 | -2.20 | -7.72  | 1.79 | 2.16 | -6.27 |
| 60 | -0.01 | -1.20 | -9.27  | 1.79 | 2.47 | -6.21 |
| 65 | -0.03 | -1.55 | -7.47  | 0.89 | 1.98 | -6.18 |
| 31 | -0.24 | -2.11 | -8.00  | 1.19 | 2.98 | -6.18 |
| 86 | -0.01 | -2.87 | -8.42  | 2.09 | 3.15 | -6.06 |
| 14 | -0.37 | -1.54 | -9.14  | 1.79 | 3.28 | -5.98 |
| 3  | -0.02 | -1.44 | -9.66  | 1.79 | 3.57 | -5.76 |
| 2  | -0.30 | -2.85 | -8.17  | 1.79 | 3.84 | -5.68 |
| 25 | -0.04 | -1.83 | -7.65  | 1.49 | 2.47 | -5.56 |
| 8  | -0.03 | -1.93 | -6.68  | 1.49 | 2.51 | -4.63 |
| 61 | -0.01 | -2.39 | -5.89  | 1.19 | 2.68 | -4.42 |

---

|    |       |       |       |      |      |       |
|----|-------|-------|-------|------|------|-------|
| 41 | -0.01 | -1.28 | -5.05 | 1.19 | 1.51 | -3.62 |
| 96 | -0.86 | -1.15 | -5.92 | 1.19 | 3.45 | -3.29 |
| 99 | -0.20 | -1.98 | -5.23 | 2.39 | 1.76 | -3.26 |

127 <sup>a</sup>Hydrogen bonding term, <sup>b</sup>Electrostatic energies term, <sup>c</sup>van der Waals term, <sup>d</sup>conformation  
128 entropy contribution, <sup>e</sup>desolvation contribution.

129

130

131

132 **Table S4** Binding free energy (kcal/mol) calculated for top 10 compounds after structure  
133 minimization and MD simulation.

| Molecule | H-bond <sup>a</sup> | Electrostatic <sup>b</sup> | vdW <sup>c</sup> | Conformation entropy <sup>d</sup> | Desolvation <sup>e</sup> | Binding free energy |
|----------|---------------------|----------------------------|------------------|-----------------------------------|--------------------------|---------------------|
| 72       | -0.05               | -1.61                      | -11.75           | 1.19                              | 2.52                     | -9.70               |
| 93       | -0.79               | -1.61                      | -9.29            | 0.89                              | 1.59                     | -9.20               |
| 36       | -0.02               | -1.72                      | -10.59           | 1.19                              | 1.96                     | -9.18               |
| 66       | -0.02               | -1.08                      | -11.45           | 1.49                              | 2.17                     | -8.89               |
| 83       | -0.23               | -1.27                      | -10.47           | 1.19                              | 2.19                     | -8.60               |
| 71       | -0.12               | -1.73                      | -10.12           | 1.19                              | 2.23                     | -8.55               |
| 43       | 0.00                | -0.96                      | -10.69           | 1.49                              | 1.90                     | -8.27               |
| 57       | -0.24               | -0.94                      | -10.41           | 1.79                              | 1.87                     | -7.94               |
| 24       | -0.05               | -0.77                      | -9.70            | 1.49                              | 1.56                     | -7.47               |
| 89       | -0.05               | -0.56                      | -8.91            | 0.89                              | 1.37                     | -7.26               |

134 <sup>a</sup>Hydrogen bonding term, <sup>b</sup>Electrostatic energies term, <sup>c</sup>van der Waals term, <sup>d</sup>conformation  
135 entropy contribution, <sup>e</sup>desolvation contribution.

136

137

138

139

140

141 **Table S5** Herbicidal activity of **Y13161** and Mesotrione.

| Compd.        | Dose (g ai/ha) | EC <sup>a</sup> | SF <sup>a</sup> | DS <sup>a</sup> | AR <sup>a</sup> | EP <sup>a</sup> | AJ <sup>a</sup> |
|---------------|----------------|-----------------|-----------------|-----------------|-----------------|-----------------|-----------------|
| <b>Y13161</b> | 150            | 100             | 100             | 95              | 100             | 70              | 100             |
|               | 75             | 92.5            | 100             | 85              | 100             | 65              | 100             |
|               | 37.5           | 87.5            | 100             | 80              | 100             | 55              | 97.5            |
| Mesotrione    | 150            | 85              | 20              | 95              | 100             | 100             | 100             |
|               | 75             | 75              | 0               | 60              | 100             | 100             | 100             |
|               | 37.5           | 30              | 0               | 30              | 100             | 100             | 100             |

142 <sup>a</sup>Abbreviations: EC, Echinochloa crus-galli; SF, Setaria faberii; DS, Digitaria sanguinalis; AR, Amaranthus  
 143 retroflexu; EP, Eclipta prostrata; AJ, Abutilon juncea.

144

145

146 **Table S6** Crop selectivity of **Y13161** and Mesotrione (150 g ai/ha).

| Compd.        | soybean | rape | cotton | maize | rice | wheat | sorghum |
|---------------|---------|------|--------|-------|------|-------|---------|
| <b>Y13161</b> | 55      | 85   | 30     | 0     | 20   | 10    | 0       |
| Mesotrione    | 55      | 100  | 70     | 10    | 50   | 40    | 70      |

147

148

149

150

151

152

153

154

155

156

157

158 **Supplemental methods**

159 **Method S1 Preparation of compound Y13161.**

160 All chemical reagents were commercially available and treated with standard methods  
161 before use. Solvents were dried and redistilled before use. <sup>1</sup>H NMR spectra were recorded on  
162 a VARIAN Mercury-Plus 600 or 400 spectrometers in CDCl<sub>3</sub> or DMSO-*d*<sub>6</sub> with TMS as the  
163 internal reference, <sup>13</sup>C NMR spectra were recorded in CDCl<sub>3</sub> on a VARIAN Mercury-Plus  
164 400 (101 MHz) spectrometer, and chemical shifts (δ) are given in ppm relative to the centre  
165 line of a triplet at 77.0 ppm of CDCl<sub>3</sub>. The following abbreviations are used to designate  
166 multiplicities: s = singlet, d = doublet, t = triplet, m = multiplet, br = broad. High resolution  
167 mass spectra (HRMS) were obtained on an Agilent 6224 TOF LC/MS (USA). Melting points  
168 were taken on a Buchi B-545 melting point apparatus and are uncorrected.

169 **Scheme 1. Synthetic route of compound Y13161.**

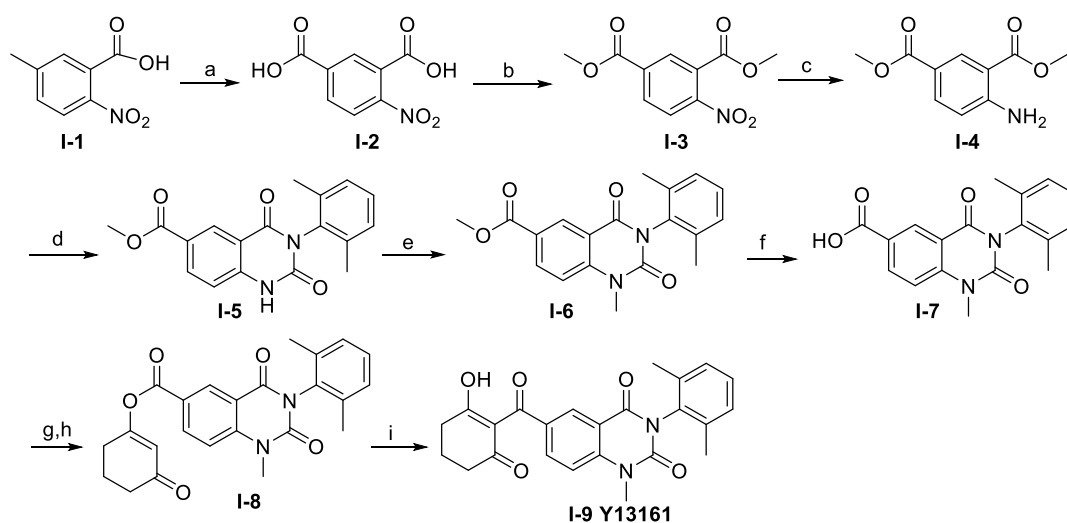

170  
171 Reagents and conditions: (a) KOH, KMnO<sub>4</sub>, HCl; (b) CH<sub>3</sub>OH, H<sub>2</sub>SO<sub>4</sub>, reflux; (c) H<sub>2</sub>, 10%  
172 Pd/C; (d) 2-isocyanato-1,3-dimethylbenzene, Pyridine, 100 °C; (e) Cs<sub>2</sub>CO<sub>3</sub>, iodomethane,  
173 DMF, rt; (f) Sulfuric acid, acetic acid, H<sub>2</sub>O; (g) SOCl<sub>2</sub>, THF, reflux; (h)  
174 1,3-cyclohexanediones, Et<sub>3</sub>N, CHCl<sub>3</sub>, 0 °C; (i) Acetone cyanohydrin, Et<sub>3</sub>N, CH<sub>2</sub>Cl<sub>2</sub>, rt.

175  
176 **Synthesis of 4-nitroisophthalic acid I-2.** To a three neck 2500 mL round-bottom flask  
177 equipped with a mechanical stirrer and a reflux condenser were added  
178 5-methyl-2-nitrobenzoic acid (100 g, 553 mmol) and water (1000 mL). KOH (31 g, 553 mmol)

179 was added with stirring; after the reaction mixture became clear, the solution was heated to  
180 90 °C and KMnO<sub>4</sub> (262.2 g, 1659 mmol) was added portion-wise over about 1 h. The  
181 suspension was then heated at this temperature for another 3 h, the reaction medium was  
182 filtered, and the residue was washed with hot water (100 mL) for three times. The filtrate was  
183 cooled to room temperature and acidified with concentrated HCl to pH = 1~2. The resulting  
184 white solid was collected by filtration and washed with water (100 mL) for three times, then  
185 dried to give **I-2** as a white solid (105 g, yield 90 %). mp, 244-246 °C; <sup>1</sup>H NMR (600 MHz,  
186 DMSO-*d*<sub>6</sub>) δ 13.99 (brs, 2H), 8.34 (d, *J* = 1.2 Hz, 1H), 8.27 (dd, *J* = 8.4, 1.8 Hz, 1H), 8.08 (d,  
187 *J* = 8.4 Hz, 1H).

188 **Preparation of dimethyl 4-nitroisophthalate I-3.** To a three neck 1000 mL round-bottom  
189 flask equipped with a mechanical stirrer and a reflux condenser were added 4-nitroisophthalic  
190 acid **I-2** (100 g, 474 mmol) and methanol (500 mL). Concentrated H<sub>2</sub>SO<sub>4</sub> (30 mL) was added  
191 drop-wise to the suspension over 30 min. The resulting solution was heated to reflux  
192 overnight, and the methanol was then removed under reduced pressure. After cooling to room  
193 temperature, the resulting white solid was dissolved in 900 mL EtOAc, the organic phase was  
194 washed with H<sub>2</sub>O (200 mL) for three times, then with saturated aqueous NaHCO<sub>3</sub> (200 mL)  
195 for three times, and finally with saturated brine (200 mL) for three washes. The organic layer  
196 was dried by anhydrous Na<sub>2</sub>SO<sub>4</sub> and concentrated by rotary evaporation to give **I-3** as a white  
197 solid (107.6 g, yield 95%). mp, 84-86 °C; <sup>1</sup>H NMR (600 MHz, CDCl<sub>3</sub>) δ 8.44 (s, 1H), 8.29 (d,  
198 *J* = 8.4 Hz, 1H), 7.93 (d, *J* = 8.4 Hz, 1H), 3.99 (s, 3H), 3.95 (s, 3H).

199 **Preparation of dimethyl 4-aminoisophthalate I-4.** To a solution containing dimethyl  
200 4-nitroisophthalate **3** (100 g, 419 mmol) in 800 mL EtOAc was added 10 g of 10% Pd/C. The  
201 mixture was hydrogenated at normal pressure for 20 h. After the reaction was completed  
202 according to TLC detection, the reaction medium was filtered through a bed of Celite, and the  
203 residue was washed with EtOAc (50 mL) for three times. After removal of the solvent under  
204 reduced pressure, **I-4** was obtained as a white solid (84.8 g, yield 97%). mp, 127-129 °C; <sup>1</sup>H  
205 NMR (400 MHz, CDCl<sub>3</sub>) δ 8.59 (d, *J* = 1.6 Hz, 1H), 7.91 (dd, *J* = 8.4 Hz, 2.0 Hz, 1H), 6.66  
206 (d, *J* = 8.8 Hz, 1H), 6.28 (brs, 2H), 3.90 (s, 3H), 3.88 (s, 3H).

207 **Synthesis of methyl 3-(2,6-dimethylphenyl)-2,4-dioxo-1,2,3,4-**  
208 **tetrahydroquinazoline-6-carboxylate I-5.** Dimethyl 4-aminoisophthalate **I-4** (20 mmol) and  
209 pyridine (30 mL) were added to a two neck 100 mL round-bottom flask and  
210 2-isocyanato-1,3-dimethylbenzene (25 mmol) was added with stirring. The resulting solution  
211 was heated to 100 °C under N<sub>2</sub> atmosphere for about 6 h. After completion of the reaction  
212 according to TLC detection, the reaction solution was cooled to room temperature and poured  
213 into water (100 mL). The mixture was stirred vigorously for 30 min and during this process a  
214 solid was formed. The resulting solid was collected by filtration and washed with ether (50  
215 mL), then dried under vacuum to afforded **I-5** in yield of 84%, mp 257-259 °C. <sup>1</sup>H NMR  
216 (400 MHz, DMSO-*d*<sub>6</sub>) δ 12.10 (s, 1H), 8.52 (d, *J* = 2.0 Hz, 1H), 8.26 (dd, *J* = 8.4, 2.0 Hz,  
217 1H), 7.37 (d, *J* = 8.4 Hz, 1H), 7.29–7.24 (m, 1H), 7.20 (d, *J* = 7.2 Hz, 2H), 3.88 (s, 3H), 2.03  
218 (s, 6H).

219 **Preparation of methyl 3-(2,6-dimethylphenyl)-1-methyl-2,4-dioxo-1,2,3,4-**  
220 **tetrahydroquinazoline-6-carboxylate I-6.** Compounds **I-5** (15 mmol) and DMF 75 mL were  
221 added into a single neck round bottom flask, and Cs<sub>2</sub>CO<sub>3</sub> (18 mmol) was added to the solution  
222 with stirring. After stirring at room temperature for 30 min, methyl iodide (30 mmol) was  
223 added to the mixture and the reaction mixture was then stirred for another 6-24 h. After  
224 completion of the reaction according to the TLC detection, the reaction mixture was poured  
225 into water (300 mL), and stirred vigorously for 30 min. The resulted solid was collected by  
226 filtration and washed with water (50 mL), then dried under vacuum to afforded **I-6** in yield of  
227 81%, mp 234-236 °C. <sup>1</sup>H NMR (600 MHz, DMSO-*d*<sub>6</sub>) δ 8.61 (s, 1H), 8.35 (d, *J* = 9.0 Hz,  
228 1H), 7.69 (d, *J* = 8.4 Hz, 1H), 7.29–7.23 (m, 1H), 7.20 (d, *J* = 7.2 Hz, 2H), 3.90 (s, 3H), 3.61  
229 (s, 3H), 2.02 (s, 6H).

230 **Synthesis of 3-(2,6-dimethylphenyl)-1-methyl-2,4-dioxo-1,2,3,4-**  
231 **tetrahydroquinazoline-6-carboxylic acid I-7.** **I-6** (10 mmol), HOAc (100 mL), and water  
232 (50 mL) was added into a single neck 500 mL round bottom flask, and H<sub>2</sub>SO<sub>4</sub> (50 mL) was  
233 added into the mixture over 20 min. The suspension was then heated to 100 °C for 12 h, until  
234 the reaction was completed according to TLC detection. The reaction medium was cooled to  
235 room temperature, poured into ice-cold water (500 mL) and stirred for 30 min. The resulting

236 solid solid was collected by filtration and washed with water (50 mL) and dried in vacuo to  
237 afford **I-7** in yield of 95%, mp 269-271 °C. <sup>1</sup>H NMR (600 MHz, DMSO-*d*<sub>6</sub>) δ 13.29 (brs,  
238 1H), 8.60 (d, *J* = 1.2 Hz, 1H), 8.33 (dd, *J* = 8.4, 1.2 Hz, 1H), 7.67 (d, *J* = 8.4 Hz, 1H), 7.26 (t,  
239 *J* = 7.2 Hz, 1H), 7.20 (d, *J* = 7.2 Hz, 2H), 3.61 (s, 3H), 2.02 (s, 6H).

240 **Synthesis of 3-oxocyclohex-1-en-1-yl 3-(2,6-dimethylphenyl)-1-methyl-2,4-**  
241 **dioxo-1,2,3,4-tetrahydroquinazoline-6-carboxylate I-8.** **I-7** (2 mmol) and THF (40 mL)  
242 were added into a single neck flask, two drops of DMF was added to the mixture, and SOCl<sub>2</sub>  
243 (3 mmol) was added to the solution over 10 min with stirring. The suspension was then heated  
244 to reflux for 3 h. The solvent of the reaction was removed under reduced pressure to afford  
245 the acid chloride; the acid chloride thus obtained was then dissolved in CHCl<sub>3</sub> (20 mL). The  
246 solution was added drop-wise to a solution of cyclohexane-1,3-dione (2 mmol) and Et<sub>3</sub>N (4  
247 mmol) in CHCl<sub>3</sub> (20 mL) at 0 °C. The mixture was then stirred at room temperature for 1 h,  
248 until the reaction was completed according to TLC detection. Water (50 mL) was added to the  
249 solution, and the mixture was stirred vigorously for 30 min. The organic layer was washed by  
250 aqueous HCl solution (50 mL, 1 mol/L), saturated aqueous NaHCO<sub>3</sub> (50 mL) and brine (50  
251 mL) in this order, dried by anhydrous Na<sub>2</sub>SO<sub>4</sub>, and concentrated by rotary evaporation. The  
252 residue was purified via flash chromatography to give intermediate **I-8** in yield of 75%, mp  
253 167-169 °C. <sup>1</sup>H NMR (600 MHz, CDCl<sub>3</sub>) δ 8.97 (s, 1H), 8.42 (d, *J* = 9.0 Hz, 1H), 7.41 (d, *J* =  
254 9.0 Hz, 1H), 7.29 (d, *J* = 7.2 Hz, 1H), 7.21 (d, *J* = 7.2 Hz, 2H), 6.09 (s, 1H), 3.73 (s, 3H), 2.57  
255 (s, 2H), 2.34 (s, 2H), 2.12 (s, 6H), 1.17 (s, 6H).

256 **Preparation of 3-(2,6-dimethylphenyl)-6-(2-hydroxy-6-oxocyclohex-1-ene-1-**  
257 **carbonyl)-1-methylquinazoline-2,4(1H,3H)-dione (Y13161).** Compound **I-8** (1 mmol) was  
258 dissolved in anhydrous CH<sub>2</sub>Cl<sub>2</sub> (30 mL) with stirring and Et<sub>3</sub>N (2 mmol) and acetone  
259 cyanohydrin (0.1 mmol) were added into the solution; the mixture was then stirred at room  
260 temperature under N<sub>2</sub> protection for 12 h. The progress of the reaction to completion was  
261 followed by TLC detection. The organic layer was washed with aqueous HCl solution (30 mL,  
262 1 mol/L) for three times, and brine (30 mL) for two times, dried by anhydrous Na<sub>2</sub>SO<sub>4</sub> and  
263 then concentrated by rotary evaporation. The residue was purified via flash chromatography  
264 to give compound **I-9** in yield of 90%, mp, 187-189 °C; <sup>1</sup>H NMR (600 MHz, CDCl<sub>3</sub>) δ 16.83



265 (s, 1H), 8.45 (d,  $J = 1.8$  Hz, 1H), 7.90 (dd,  $J = 9.0, 1.8$  Hz, 1H), 7.29 (d,  $J = 9.0$  Hz, 1H), 7.24  
 266 (d,  $J = 7.2$  Hz, 1H), 7.18 (d,  $J = 7.2$  Hz, 2H), 3.69 (s, 3H), 2.78 (t,  $J = 6.0$  Hz, 2H), 2.52 (t,  $J =$   
 267 6.6 Hz, 2H), 2.14–2.06 (m, 8H).  $^{13}\text{C}$  NMR (101 MHz,  $\text{CDCl}_3$ )  $\delta$  196.52, 196.38, 194.30,  
 268 160.24, 149.89, 143.26, 135.50, 135.27, 133.59, 132.94, 130.20, 128.83, 128.48, 114.87,  
 269 112.99, 37.91, 32.18, 31.05, 18.91, 17.71.  $^{13}\text{C}$  NMR (101 MHz,  $\text{CDCl}_3$ )  $\delta$  196.35, 196.26,  
 270 194.18, 160.12, 149.72, 143.13, 135.42, 135.15, 133.53, 132.79, 129.99, 128.65, 128.32,  
 271 114.70, 112.94, 112.87, 37.76, 32.01, 30.92, 18.77, 17.57. HRMS (ESI): calcd for  $\text{C}_{24}\text{H}_{22}\text{N}_2\text{O}_5$   
 272  $[\text{M}^+\text{Na}]^+$  441.1426, found: 441.1420.

273

274

## 275 **Method S2 Inhibitory Kinetics of HPPD.**

276 **Scheme S2.** The reaction mechanism for the competitive slow-binding inhibitors.

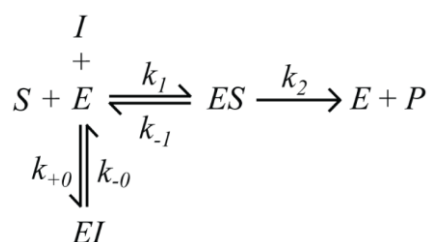

277

278 Where  $S$ ,  $E$ ,  $I$  and  $P$  represent the substrate, enzyme, inhibitor and product, respectively.

279 According to the substrate reaction kinetic theory, the accumulation of product with time can

280 be expressed by equation (1):

$$[P] = v_s t + \frac{v_0 - v_s}{k_{obs}} (1 - e^{-k_{obs} t}) \quad (1)$$

281

282 where  $v_0$  and  $v_s$  are the initial and steady-state velocities of the reaction in the presence of  
 283 inhibitor.  $k_{obs}$  is the observed first order rate constant, which can be generated against inhibitor  
 284 concentration.

$$k_{obs} = A[I]_0 + B \quad (2)$$

285

286 Experimentally, the association and dissociation rate constants  $k_{+0}$  and  $k_{-0}$  can be ascertained

287 by studying the effect of  $[S]$  on the apparent rate constants  $A$  and  $B$ .

$$A = \frac{k_{+0}}{1 + \frac{[S]}{K_m}} \quad (3)$$

288

$$B = k_{-0} \quad (4)$$

289

290 where  $K_m$  is Michaelis-Menten constants.

291

292

### 293 **Method S3 Computational Simulation.**

294 *Structure-based virtual screening.* Among the commercialized HPPD herbicides, six of them  
295 belongs to the triketone derivatives and they are the most deeply studied, owing to their  
296 structure diversity. So we constructed a triketone-linked molecules library by using an in house  
297 fragment library based on the fragment-based drug design (FBDD) strategy.[1] The library  
298 consists of three-dimensional structures of 9,402 medicine fragments and 5,833 pesticide  
299 fragments. The three-dimensional structure of motif 2-benzoylcyclohexane-1,3-dione were  
300 constructed with SYBYL 7.0[2] as the core and then linked it to all the fragments by using a  
301 modified version of AutoGrow program.[3] Finally, we got the molecule library, that contains  
302 15,235 triketone derivatives for virtual screening. The structure of *At*HPPD was taken from the  
303 Protein Data Bank (PDB ID 1SQD) and was prepared with Discovery Studio 2.5 software.[4] A  
304 consensus docking strategy was performed to get binding pose for every library molecule.  
305 AutoDock 4.0,[5] Vina 1.1.2,[6] Plants 1.2,[7] LeDock[8] were used to search binding  
306 conformations for molecules at the iron(II) active center of *At*HPPD. For every docking tools  
307 we got 20 conformations and then all of them were clustered by 0.8 Å of RMSD criteria. During  
308 the docking process, Gln293 representative conformations were selected from every cluster and  
309 the semiempirical score function in AutoDock4.0 was used to evaluate binding free energy for  
310 the ligand-*At*HPPD system. The best scored conformation was taken into account as the final  
311 docking pose. Finally, we got the binding energy ranking list for 14,751 molecules after  
312 excluding some invalid data ([work flow can be seen in main text Fig. 4](#)).

313

314 *Structure optimization and MD simulation.* The top 100 structures (Table S2) of 14,751 result  
315 were selected out for further study. Three-step energy minimization were carried out to every  
316 selected ligand-AtHPPD complex by using Sander of Amber16 program,[9] first to minimize  
317 all the hydrogens and other atoms were fixed. Secondly, only backbone atoms of HPPD were  
318 fixed, and others were allowed to move. Thirdly, all atoms were free to move. For all the three  
319 steps, we used steepest descent method for 2000 steps and conjugated gradient method for  
320 2000 steps. The binding free energy between the top 100 molecules and AtHPPD was  
321 recalculated based on the optimized structures. The results were shown in Table S3 ranked by  
322 the value of binding free energy. To further confirm the binding stability, molecular dynamics  
323 (MD) simulation was performed for the 10 best bound candidates (number 83, 36, 89, 24, 66, 43,  
324 93, 57, 71, 72) of the 100 molecules with the AtHPPD. For MD simulation, the quantum  
325 mechanics (QM) calculations were first performed for the 10 candidates at the HF/6-31+G\*  
326 basis function to obtain the electrostatic potential by using the restrained electrostatic  
327 potential (RESP) method.[10] Then, Antechamber module in Amber16 program was  
328 employed to generate RESP charges for the molecules. The optimized structures in previous  
329 step were used as initial ligand-AtHPPD complex structure for MD simulation and the  
330 topology and coordinate files were constructed with Leap module in Amber16 program under  
331 ff14SB force field.[11] Each complex was solvated in the TIP3P waters[12] and neutralized  
332 by the counterions. 50 ps's simulation was first added to the solvent molecules and ions for  
333 getting an equilibrated solvent environment. Then the system temperature was heated from 0  
334 K to 298 K during 100 ps. At last, 6 ns's simulation was maintained at 298 K with a constant  
335 pressure. During the MD simulation, we used a distance constraint setting to make the  
336 bidentate association between active site Fe(II) and oxygens on ligand triketone motif keep a  
337 reasonable distance. The periodic boundary condition and SHAKE algorithm[13] were also  
338 applied for the MD simulation. The plot of root-mean-square deviation (RMSD) of the protein  
339 backbone and ligand atoms across the whole MD process was examined for convergence (Fig.  
340 S13). We can find that all the five candidates can reach equilibrium states according to the  
341 RMSD values of the MD trajectory. For a more precise examination of binding free energy,  
342 100 snapshots for every of the 10 compounds were extracted from the last 1ns MD trajectory

343 with a time interval of 10 ps by using Cpptraj module[14] in Amber16 program. The average  
344 binding free energy were calculated by using the AutoDock semiempirical score function. The  
345 binding free energy (Table S3) for the 10 candidates range from -6.80 kcal/mol to -9.70  
346 kcal/mol. Molecule 72 shows the best binding affinity with the value -9.70 kcal/mol. Compared  
347 the energy terms between molecule 72 and others, the mainly difference comes from the van  
348 der Waals (vdW) energy term, that means molecule 72 has stronger vdW interaction with  
349 HPPD than the others. The co-crystal structure of molecule 72 bind with AtHPPD were  
350 resolved by us, and it is used to compare with the docking binding mode and MD convergent  
351 conformation (Fig. S14). We can see that the docking conformation (blue) and MD convergent  
352 conformation (yellow) of molecule 72 keep very similar binding pose with the crystal  
353 conformation (green).

354

355

### 356 *Supplemental Reference*

- 357 [1] Hao GF, Jiang W, Ye YN, Wu FX, Zhu XL, Guo FB, Yang GF (2016) ACFIS: a web  
358 server for fragment-based drug discovery. *Nucleic Acids Res* **44** (W1): W550-W556. doi:  
359 10.1093/nar/gkw393.
- 360 [2] Molecular Modeling System SYBYL, TROPS Associates, Inc., St. Louis, MO 63117.
- 361 [3] Durrant JD, Amaro RE, McCammon JA (2009) AutoGrow: a novel algorithm for protein  
362 inhibitor design. *Chem Biol Drug Des* **73** (2): 168-178. doi:  
363 10.1111/j.1747-0285.2008.00761.x.
- 364 [4] Dassault Systèmes BIOVIA, Discovery Studio Modeling Environment, Release 2017,  
365 San Diego: Dassault Systèmes, 2016.
- 366 [5] Huey R, Morris GM, Olson AJ, Goodsell DS (2007) A semiempirical free energy force  
367 field with charge-based desolvation. *J Comput Chem* **28** (6): 1145-1152. doi:  
368 10.1002/jcc.20634.
- 369 [6] Trott O, Olson AJ (2010) AutoDock Vina: improving the speed and accuracy of docking  
370 with a new scoring function, efficient optimization, and multithreading. *J Comput Chem*  
371 **31** (2): 455-461. doi: 10.1002/jcc.21334.

- 372 [7] Korb O, Stutzle T, Exner TE (2009) Empirical scoring functions for advanced  
373 protein-ligand docking with PLANTS. *J Chem Inf Model* **49** (1): 84-96. doi:  
374 10.1021/ci800298z.
- 375 [8] Wang Z, Sun H, Yao X, Li D, Xu L, Li Y, Tian S, Hou T (2016) Comprehensive  
376 evaluation of ten docking programs on a diverse set of protein-ligand complexes: the  
377 prediction accuracy of sampling power and scoring power. *Phys Chem Chem Phys* **18**  
378 (18): 12964-12975. doi: 10.1039/c6cp01555g.
- 379 [9] Case, D.A., Betz, R.M., Cerutti, D.S. & Kollman, P.A. (2016) AMBER 2016:University  
380 of California, San Francisco.
- 381 [10] Singh, U.C. & Kollman, P.A. (1984) An approach to computing electrostatic charges for  
382 molecules. *J Comput Chem* **5** (2): 129-145.
- 383 [11] Maier JA, Martinez C, Kasavajhala K, Wickstrom L, Hauser KE, Simmerling C (2015)  
384 ff14SB: Improving the Accuracy of Protein Side Chain and Backbone Parameters from  
385 ff99SB. *J Chem Theory Comput* **11** (8): 3696-3713. doi: 10.1021/acs.jctc.5b00255.
- 386 [12] Jorgensen, W.L., Chandrasekhar, J., Madura, J.D., Impey, R.W. & Klein, M.L. (1983)  
387 Comparison of simple potential functions for simulating liquid water. *J Chem Phys* **79**:  
388 926-935.
- 389 [13] Ryckaert, J.P., Ciccotti, G. & Berendsen, H.J.C. (1977) Numerical integration of the  
390 Cartesian equations of motion of a system with constraints: molecular dynamics of  
391 n-alkanes. *J Comput Phys* **23** (3): 327-341.
- 392 [14] Roe DR, Cheatham TE, 3rd (2013) PTRAJ and CPPTRAJ: Software for Processing and  
393 Analysis of Molecular Dynamics Trajectory Data. *J Chem Theory Comput* **9** (7):  
394 3084-3095. doi: 10.1021/ct400341p.

395
